# Supplementary material
Source: publisher figshare collection journal article supplement (https://sage.figshare.com/ndownloader/files/20141090)
Supplement: Supplementary file 1 [file 20141090]

**Supplementary Material 1. Literature search strategies**

***For PubMed:***

(cancer[mesh] OR malignancy[mesh] OR carcinoma[mesh])

AND

(“air pollution”[mesh] OR “air pollutants”[mesh] OR “particulate matter”[tiab] OR “PM2.5”[tiab] OR “PM10”[tiab] OR “nitrogen dioxide” [tiab] OR “sulphur dioxide”[tiab] OR “ozone”[tiab])

NOT systematic review[pt] NOT review[pt] NOT case reports[pt] NOT clinical conference[pt] NOT congresses[pt] NOT editorial[pt] NOT Meta-analysis[pt] NOT other animals[mh]

***EMBASE: limited to Humans and Article***

('cancer' or ‘malignancy’ or ‘carcinoma’) and ('air pollution' or ‘air pollutants’ or ‘particulate matter’ or ‘PM2.5’ or ‘PM10’ or ‘nitrogen dioxide’ or ‘sulphur dioxide’ or ‘ozone’) and (‘cross-sectional study’ or ‘case-control study’ or 'cohort study')

***Cochrane Library: No limit***

(cancer or malignancy or carcinoma) and (air pollution or air pollutants or particulate matter or PM2.5 or PM10 or nitrogen dioxide or sulphur dioxide or ozone) and (cross-sectional study or case-control study or cohort study)


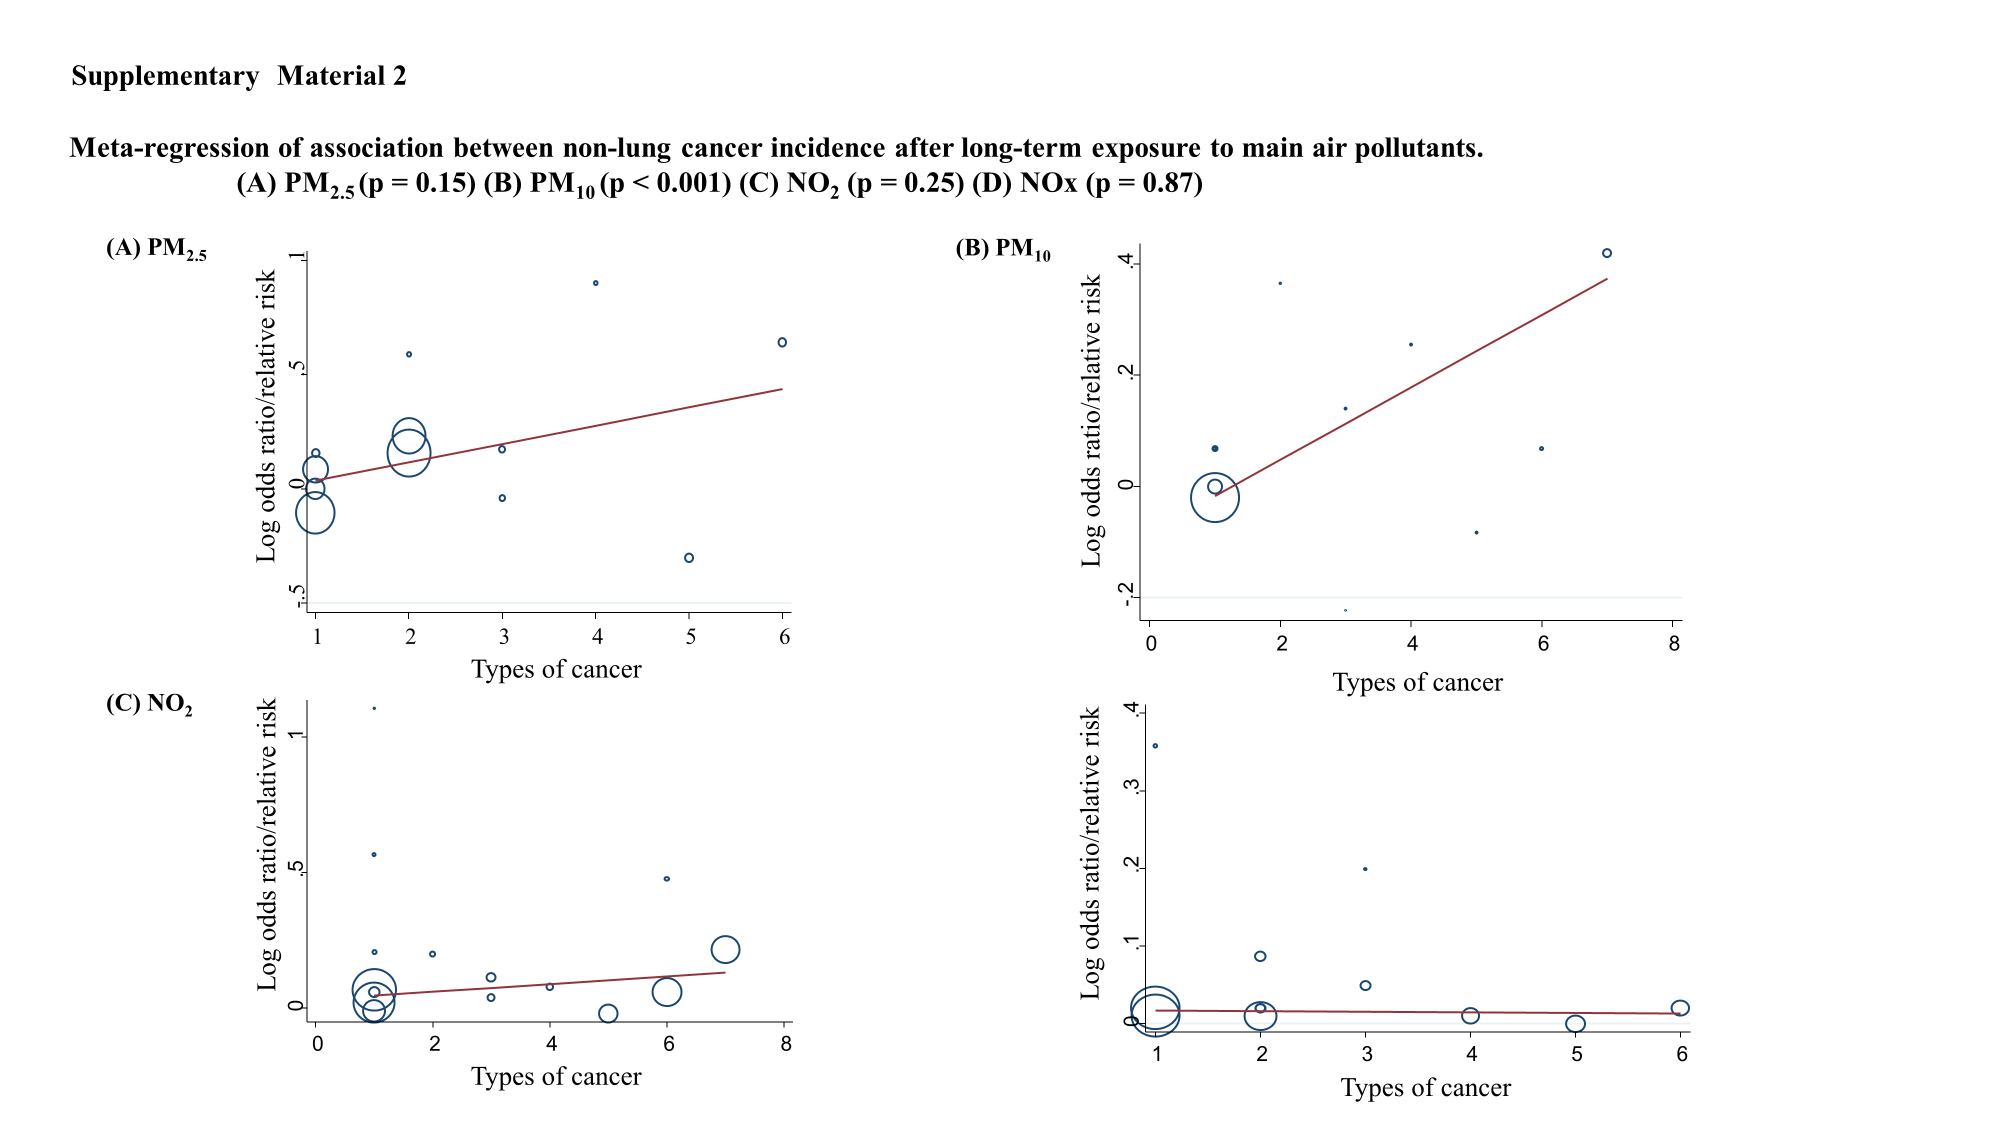


Types of cancer: (A) 1: Breast cancer, 2: Liver cancer, 3: Brain cancer, 4: Kidney cancer,

5: Bladder cancer, 6: Stomach cancer

(B) 1: Breast cancer, 2: Liver cancer, 3: Brain cancer, 4: Kidney cancer,

5: Bladder cancer, 6: Stomach cancer, 7: NMSC (non-melanoma skin cancer)

(C) 1: Breast cancer, 2: Liver cancer, 3: Brain cancer, 4: Kidney cancer,

5: Bladder cancer, 6: Prostate cancer, 7: NMSC (non-melanoma skin cancer)

(D) 1: Breast cancer, 2: Brain cancer, 3: Liver cancer, 4: Kidney cancer,

5: Bladder cancer, 6: Stomach cancer
